# Supplementary material
Source: Springer Nature journal article supplement (https://www.springermedizin.de/resource/supplementary/12916_2010_286_MOESM3_ESM.pdf/9599556)

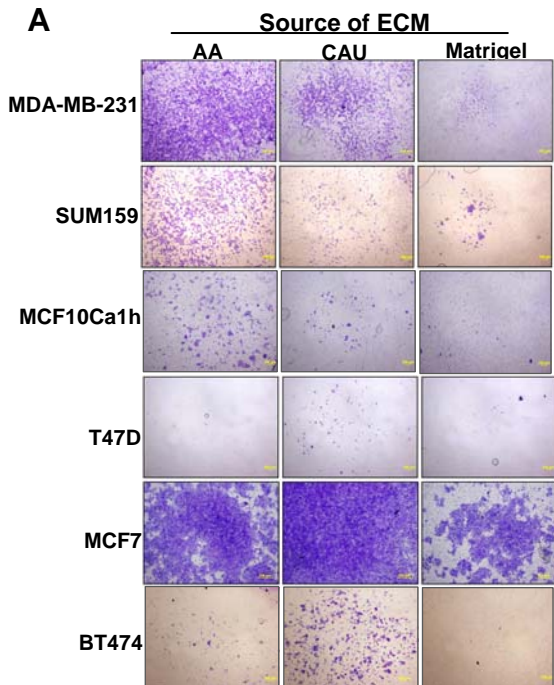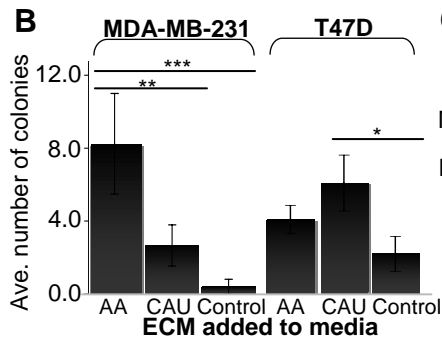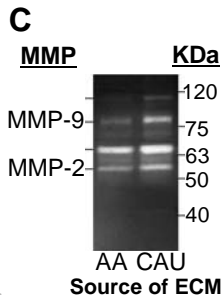

Supplement: MOESM3 [file 9599556]
